# Supplementary material for: Comparative Genetic Structure of Cannabis sativa Including Federally Produced, Wild Collected, and Cultivated Samples
Source: Front Plant Sci. 2021 Sep 29;12:675770. doi: 10.3389/fpls.2021.675770 (PMC8544287; doi:10.3389/fpls.2021.675770)
Supplement: Supplementary file 1 [file Table_1.XLSX]

## Sheet: Sup Table 1
Supplemental Table 1: Samples and data for 49 samples and 10 microsatellite loci. The samples are arranged by category assignment. Herbarium specemin accession numbers are reported for Wild Collected Hemp, and strain names are listed as reported from the dispensary. Locations of where each sample was acquired is given as well as the reported proportion of sativa as given on Wikileaf (cite).
Sample Name	Identification	Type	Samples included in Schwabe and McGlaughlin 2019 - 1	Proportion Sativa - 2	City, State	Dispensary/ Supplier	2 -1	2 -2	6 -1	6 -2	14 - 1	14 - 2	18 - 1	18 - 2	22 - 1	22 - 2	26 - 1	26 - 2	27 - 1	27 - 2	28 - 1	28 - 2	29 - 1	29 - 2	30 - 1	30 - 2
Wild Hemp 1	1019	Hemp (female)	No	NA	Denver, Colorado	DBG Herbarium	276	282	416	422	272	272	206	206	192	196	242	242	184	193	175	190	189	189	265	294
Wild Hemp 2	24845	Hemp (male)	No	NA	Denver, Colorado	DBG Herbarium	282	282	416	416	254	254	206	206	184	192	206	206	181	193	175	175	177	177	291	291
Wild Hemp 3	25572	Hemp (male)	No	NA	Denver, Colorado	DBG Herbarium	276	276	410	416	260	260	0	0	192	192	0	0	184	184	181	181	186	195	294	303
Wild Hemp 4	22831M	Hemp (male)	No	NA	Greeley, Colorado	UNC Herbarium	300	300	410	416	263	263	212	212	192	192	0	0	184	193	175	199	177	177	303	303
Wild Hemp 5	28381M	Hemp (male)	No	NA	Denver, Colorado	DBG Herbarium	276	276	416	416	272	272	212	212	184	184	194	194	193	196	190	190	186	186	267	267
Wild Hemp 6	UnkM	Hemp (male)	No	NA	Boulder, Colorado	CGRI	300	300	416	416	281	281	209	209	184	192	197	239	184	199	175	178	177	180	261	261
C. ruderalis	Cara#2_4	Hemp (C. ruderalis)	No	NA	Boulder, Colorado	CGRI	276	306	416	416	254	254	206	212	184	192	206	206	184	184	178	181	183	186	303	303
Carmagnola	Carm	Hemp	No	NA	San Luis Valley, Colorado	Colorado Seed	276	300	416	416	281	281	203	212	192	192	197	197	184	199	178	178	186	195	261	261
Colorado Gold	CoGo	Hemp	No	NA	San Luis Valley, Colorado	Colorado Seed	276	276	410	422	254	254	209	218	184	188	206	206	184	190	193	193	192	195	0	0
NIDA THC	NIDA_THC	High THC	No	NA	Oxford, Mississippi	Univ. of Misssissippi	276	276	416	416	272	272	191	215	192	192	215	215	184	193	169	169	189	192	265	326
NIDA THC/CBD	NIDA_THC-CBD	High THC/ CBD	No	NA	Oxford, Mississippi	Univ. of Mississippi	276	294	416	416	272	272	191	215	192	192	215	215	184	193	169	169	192	192	326	326
Fuck Cancer	FuCa	High CBD	No	NA	Colorado Springs, Colorado	Clone (High CBD)	300	300	416	416	260	272	212	221	192	192	206	206	184	184	172	175	183	183	309	309
Juanita La Lagrimosa	JLL_2	High CBD	No	NA	Greeley, Colorado	Nature's Herbs and Wellness	300	312	416	416	297	297	188	188	192	192	206	206	184	184	175	175	192	192	303	303
Otto	Otto1	High CBD	No	NA	Boulder, Colorado	Centennial Seeds	324	324	416	416	275	284	188	221	184	192	206	206	184	184	172	175	195	195	300	300
Durban Poison	DuPo_19	Sativa	Yes	100	Denver, Colorado	The Kind Room	300	324	416	422	272	275	188	188	188	196	188	188	196	208	190	190	186	195	269	275
Eldorado	ElDo_1	Sativa	Yes	100	Greeley, Colorado	Smokey's 420	300	300	416	416	272	281	188	188	192	192	206	206	184	193	175	190	183	192	252	252
Hawaiian	Hawa_9	Sativa	Yes	100	Fort Collins, Colorado	Best Colorado Meds	324	324	416	416	284	287	206	206	192	192	206	206	184	184	178	187	183	192	273	300
Sour Diesel	SoDi_2a	Sativa	Yes	90	Greeley, Colorado	Nature's Herbs and Wellness	300	324	422	422	281	281	188	188	192	192	206	206	184	193	190	190	183	192	300	300
Island Sweet Skunk	ISS_1	Sativa	Yes	80	Greeley, Colorado	Smokey's 420	270	270	410	416	284	297	188	188	184	192	206	206	184	184	175	190	183	192	273	300
Agent Orange	AgOr_1	Sativa	No	75	Greeley, Colorado	Nature's Herbs and Wellness	276	324	416	422	284	284	212	221	192	192	206	206	184	205	172	190	183	183	300	300
Cinderella 99	Cin99_1	Sativa	No	70	Greeley, Colorado	Smokey's 420	300	300	410	410	281	284	188	188	192	208	206	206	184	184	175	175	183	183	300	300
AK-47	AK47_21	Sativa	No	65	Fort Collins, Colorado	Herbal Alternative	270	324	416	416	284	284	212	221	192	192	206	206	184	193	175	175	183	183	300	300
Golden Goat	GoGo_19	Sativa	Yes	65	Denver, Colorado	The Kind Room	270	270	410	410	284	297	188	212	184	192	206	206	184	184	190	190	183	192	273	300
Gorilla Glue #4	GoGl#4_20	Sativa	No	65	Fort Collins, Colorado	Colorado Wellness	300	324	416	416	281	287	188	188	192	192	206	206	184	199	190	190	192	192	273	300
Green Crack	GrCr_2b	Sativa	No	65	Greeley, Colorado	Nature's Herbs and Wellness	270	300	410	416	287	287	182	188	192	192	253	253	184	190	175	202	183	192	300	300
Bruce Banner	BrBa_19	Hybrid	Yes	60	Denver, Colorado	The Kind Room	300	324	416	416	281	287	188	221	192	192	206	206	184	193	172	190	183	192	300	300
Flo	Flo_9	Hybrid	Yes	60	Fort Collins, Colorado	Best Colorado Meds	270	270	416	416	279	284	188	188	184	184	206	206	184	205	175	190	183	189	300	300
Jillybean	JiBe_1	Hybrid	Yes	60	Greeley, Colorado	Smokey's 420	276	276	416	416	284	284	188	188	192	192	206	206	184	184	190	190	183	192	300	300
Pineapple Express	PiEx_2	Hybrid	Yes	60	Greeley, Colorado	Nature's Herbs and Wellness	300	300	416	416	287	287	206	212	192	192	206	206	184	184	172	175	192	192	273	300
Purple Haze	PuHa_22	Hybrid	Yes	60	Denver, Colorado	Lucy Sky	300	300	416	416	284	287	209	209	184	208	203	206	184	205	172	172	189	192	300	300
White Widow	WhWi_1	Hybrid	No	60	Greeley, Colorado	Smokey's 420	300	324	416	416	284	284	212	212	184	192	206	206	184	193	175	190	183	192	300	300
Chem Dawg	ChDa_8	Hybrid	Yes	55	San Luis Opisbo, California	The Station	270	300	416	422	287	291	185	212	192	192	206	206	184	184	172	172	183	192	265	300
Jack Herer	JaHe_12	Hybrid	Yes	55	San Luis Opisbo, California	The Milkman	270	324	416	416	281	287	188	221	192	208	206	206	184	193	172	172	183	192	300	300
OG Kush	OGKu_21	Hybrid	Yes	55	Fort Collins, Colorado	Herbal Alternative	270	270	416	416	284	297	188	212	192	208	206	206	184	184	190	190	183	192	300	300
Blue Dream	BlDr_19	Hybrid	Yes	50	Denver, Colorado	The Kind Room	276	324	416	416	281	287	188	188	208	208	206	206	196	196	190	190	186	192	275	309
Tahoe OG	TaOG_11	Hybrid	Yes	50	Fort Collins, Colorado	KindCare	300	324	416	416	281	281	188	227	208	208	203	203	193	193	190	190	192	192	275	303
Chem Dawg D	ChDaD_19	Hybrid	Yes	45	Denver, Colorado	The Kind Room	324	324	416	416	281	284	188	227	208	208	206	206	184	196	172	172	183	192	281	281
Banana Kush	BaKu_2	Hybrid	Yes	40	Greeley, Colorado	Nature's Herbs and Wellness	270	324	416	416	281	281	188	188	192	192	206	206	184	196	190	190	192	192	300	300
Girl Scout Cookie	GSC_14	Hybrid	Yes	40	San Luis Opisbo, California	Day & Night	276	300	422	422	281	281	188	188	192	192	206	206	184	193	172	172	183	192	265	265
G-13	G13_10	Indica	Yes	30	Fort Collins, Colorado	Infinite Wellness	270	270	416	416	279	284	188	227	184	184	206	206	184	205	187	190	183	189	281	303
Lemon Diesel	LeDi_2	Indica	No	30	Greeley, Colorado	Nature's Herbs and Wellness	276	276	422	422	284	284	212	212	192	192	206	206	184	184	172	175	183	183	300	300
Australian Hash Plant	HaPlAu_1	Indica	Yes	20	Greeley, Colorado	Smokey's 420	300	300	416	416	272	284	188	188	192	208	188	188	193	196	190	202	183	189	252	252
Hash Plant	HaPl_1	Indica	Yes	20	Greeley, Colorado	Smokey's 420	306	306	416	416	287	287	221	221	184	184	206	206	184	193	172	175	183	189	252	261
Pre-Bubba Kush 98	Bub98_19	Indica	Yes	15	Denver, Colorado	The Kind Room	324	324	410	416	281	281	182	188	192	208	206	206	184	196	190	190	192	192	297	297
Mother of Berries	MoBe_2	Indica	No	10	Greeley, Colorado	Nature's Herbs and Wellness	270	300	416	416	284	287	188	212	192	192	203	203	184	184	172	172	189	192	273	300
Northern Lights	NoLi_15	Indica	No	5	San Luis Opisbo, California	CannaExpress	276	276	416	416	284	284	212	212	192	192	206	206	184	184	175	175	183	183	300	300
Grape Ape	GrAp_16	Indica	Yes	0	Union Gap, Washington	Slow Burn	300	300	416	416	272	287	188	188	192	192	206	206	184	187	172	196	183	195	300	300
Purple Kush	PuKu_19	Indica	Yes	0	Denver, Colorado	The Kind Room	294	300	416	422	281	287	188	188	192	208	206	206	196	199	172	190	192	192	273	273
Tora Bora	ToBo_4	Indica	Yes	0	Boulder, Colorado	CGRI	276	276	416	416	272	287	188	191	208	208	203	206	193	199	190	190	186	192	273	273
1 - Schwabe, A.L., and McGlaughlin, M.E. 2019. Genetic tools weed out misconceptions of strain reliability in Cannabis sativa: Implications for a budding industry. Journal of Cannabis Research 1: p.332320. doi:https://doi.org/10.1101/332320.
2 - Sativa proportion is based on lineage and consumer feedback as provided by the online database WikiLeaf
